# Supplementary material for: An Essential Role for the Transcription Factor Runx1 in T Cell Maturation
Source: PubMed Central journal article supplement (PMC4810436; doi:10.1038/srep23533), 2016-03-29
Supplement: srep23533-s1.pdf [file srep23533-s1.pdf]

## **An Essential Role of Transcription Factor Runx1 for T Cell Maturation**

Fan-Chi Hsu<sup>1</sup>, Michael J. Shapiro<sup>1</sup>, Barsha Dash<sup>1</sup>, Chien-Chang Chen<sup>1</sup>, Megan M.

Constans<sup>1</sup>, Ji Young Chung<sup>1</sup>, Sinibaldo R. Romero Arocha<sup>1</sup>, Paul J. Belmonte<sup>1</sup>, Meibo W.

Chen<sup>1</sup>, Douglas C. McWilliams<sup>1</sup>, and Virginia Smith Shapiro<sup>1</sup>

<sup>1</sup>Department of Immunology, Mayo Clinic, Rochester, MN, United States

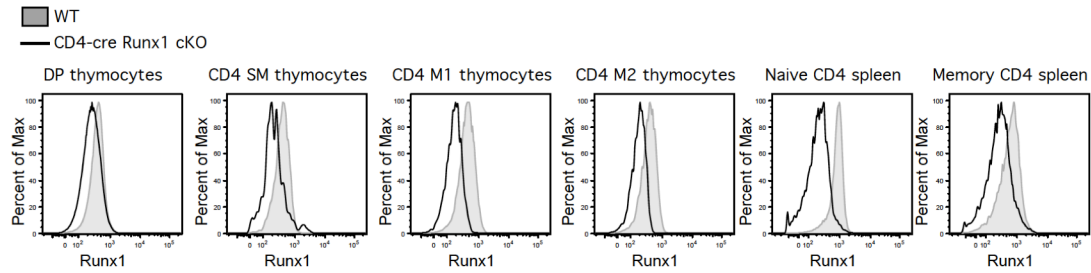

### Supplemental Figure 1

#### Runx1 protein expression throughout T cell development in CD4-cre Runx1 cKO mice and WT mice

Intranuclear Runx1 staining was performed on thymocytes and splenocytes from WT and CD4-cre Runx1 cKO mice. The protein levels of Runx1 in DP ( $CD4^+CD8^+$ ), CD4 SM ( $CD4^+CD8^-CD24^{hi}CCR7^{lo}$ ), CD4 M1 SP ( $CD4^+CD8^-CD24^{hi}CCR7^{hi}$ ) thymocytes, CD4 M2 SP ( $CD4^+CD8^-CD24^{lo}CCR7^{hi}$ ) thymocytes, naive ( $CD4^+CD62L^+CD44^-$ ) and memory ( $CD4^+CD62L^-CD44^+$ ) T cells from both WT and CD4-cre Runx1 cKO mice were examined. As intranuclear staining destroys GFP fluorescence, expression of Runx1 in RTEs was not examined. Data shown are representative of five WT and five Rag1-GFP CD4-cre Runx1 cKO mice from five separate experiments.

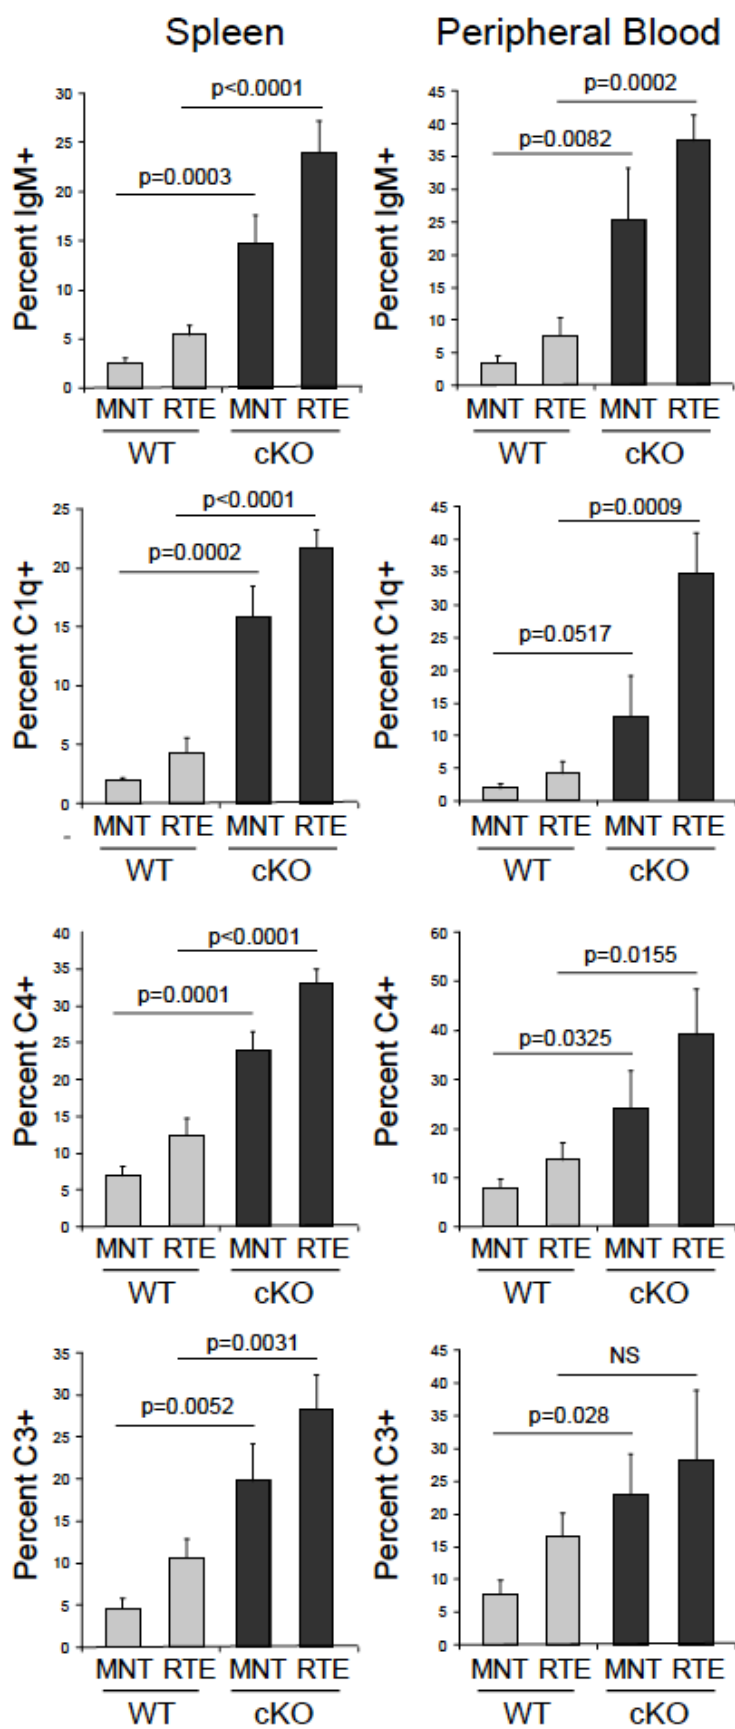

## Supplemental Figure 2

### **Quantitation of IgM and complement protein deposition on splenic and peripheral blood Runx1-deficient CD4<sup>+</sup> RTEs and MNTs as compared to WT**

Deposition of IgM, C1q, C4 and C3 in splenic (left column) and peripheral blood (right column) CD4<sup>+</sup> RTEs and MNTs from Rag1-GFP WT and Rag1-GFP CD4-cre Runx1 cKO mice as shown in Figure 3 was quantified across several experiments. For analysis of complement deposition in splenic CD4<sup>+</sup> T cells, the results shown are quantified from at least 6 Rag-GFP WT and 5 Rag-GFP CD4-cre Runx1 cKO mice from 5 independent experiments. For the analysis of complement deposition in peripheral blood CD4<sup>+</sup> T cells, the results shown are quantified from at least 6 Rag1-GFP WT and 3 Rag1-GFP CD4-cre Runx1 cKO mice. Error bars represent SEM, and significance was determined by unpaired Student's *t* test using GraphPad Prism.

## Spleen

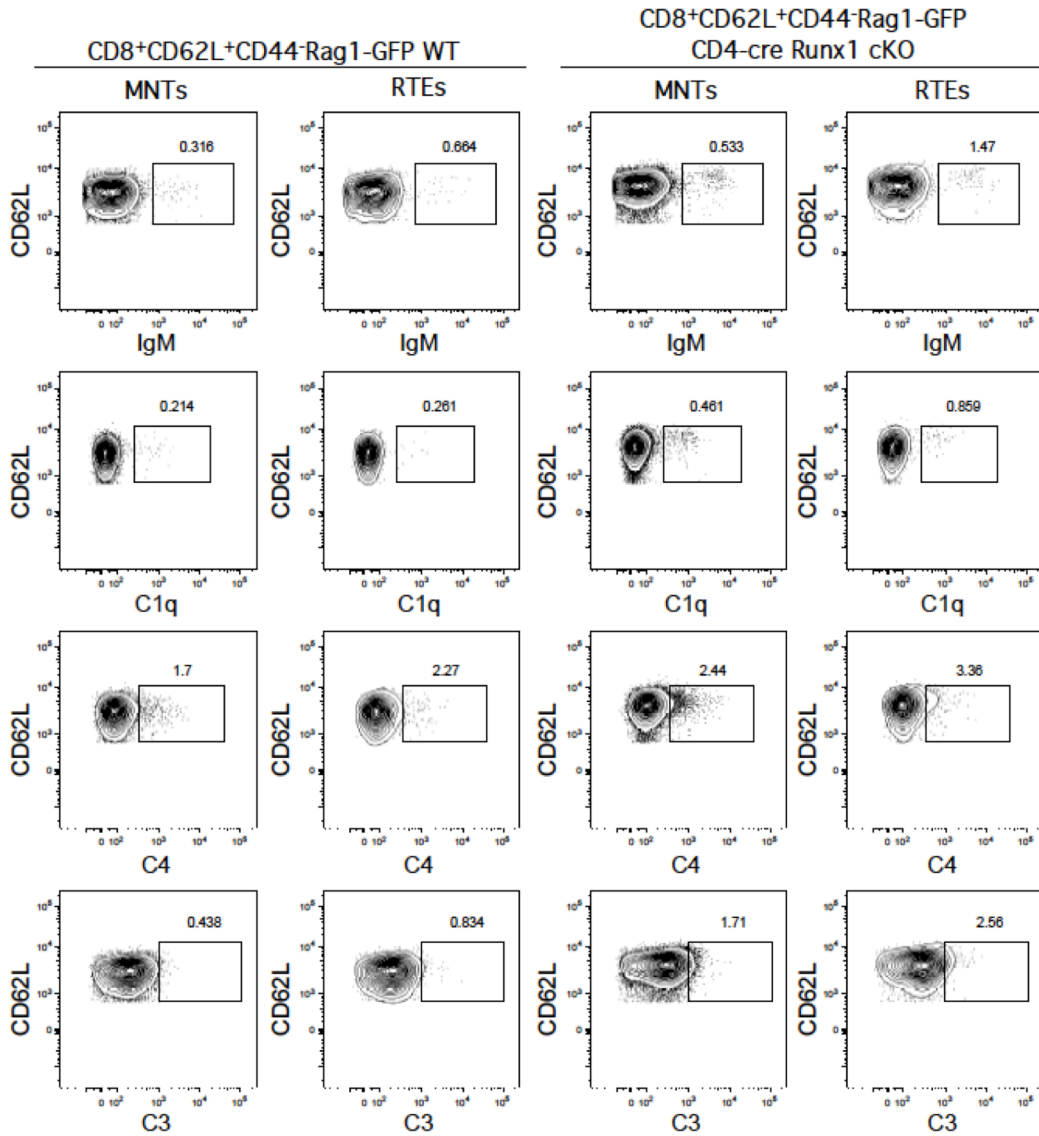

### Supplemental Figure 3

**IgM, C1q, C4 and C3 are not deposited on CD8<sup>+</sup> T cells from CD4-cre Runx1 cKO mice**

Splenic CD8<sup>+</sup> RTEs and MNTs from Rag1-GFP WT and Rag1-GFP CD4-cre Runx1 cKO mice were examined for the deposition of IgM, C1q, C4 and C3 as denoted in the figure. Cells were incubated in GVB<sup>++</sup> buffer prior to staining with indicated Abs. CD8<sup>+</sup> RTEs were

gated on CD62L<sup>+</sup>CD44<sup>-</sup>Rag1-GFP<sup>+</sup> while CD8<sup>+</sup> MNTs were gated on CD62L<sup>+</sup>CD44<sup>-</sup>Rag1-GFP<sup>-</sup>. Data shown are representative of six Rag1-GFP WT and six Rag1-GFP CD4-cre Runx1 cKO mice from five separate experiments.

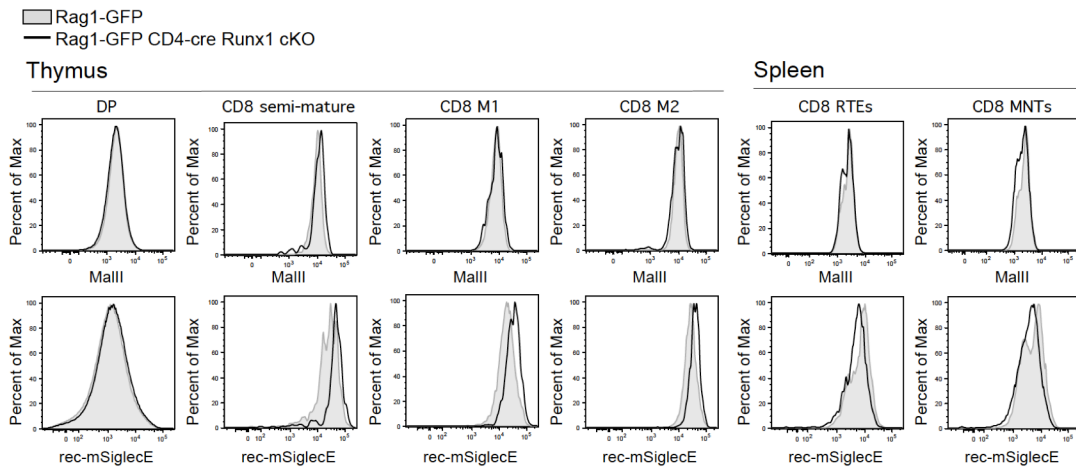

#### Supplemental Figure 4

#### $\alpha$ 2,3- and $\alpha$ 2,8-sialylation on CD8 SP thymocytes and CD8<sup>+</sup> T cells is not altered from CD4-cre Runx1 cKO mice

DP (CD4<sup>+</sup>CD8<sup>+</sup>), SM CD8 SP (CD8<sup>+</sup>CD24<sup>hi</sup>CCR7<sup>lo</sup>), M1 CD8 SP (CD8<sup>+</sup>CD24<sup>hi</sup>CCR7<sup>hi</sup>), M2 CD8 SP (CD8<sup>+</sup>CD24<sup>lo</sup>CCR7<sup>hi</sup>) thymocytes, splenic CD8<sup>+</sup> RTEs (CD8<sup>+</sup>CD62L<sup>+</sup>CD44<sup>+</sup>Rag1-GFP<sup>+</sup>), CD8<sup>+</sup> MNTs (CD8<sup>+</sup>CD62L<sup>+</sup>CD44<sup>-</sup>Rag1-GFP<sup>-</sup>) from Rag1-GFP WT (grey histogram) and Rag1-GFP CD4-cre Runx1 cKO mice (solid line) were examined for  $\alpha$ 2,8-sialylation by using recombinant mSiglec-E Fc chimera (rec mSiglec-E) and  $\alpha$ 2,3-sialylation using MaIII. Thymocytes were first gated on expression of Rag1-GFP to exclude recirculating mature T cells. Representative FACS analysis from at least three mice in each group from three separate experiments is shown.
